# Supplementary material
Source: PubMed Central journal article supplement (PMC2941554)

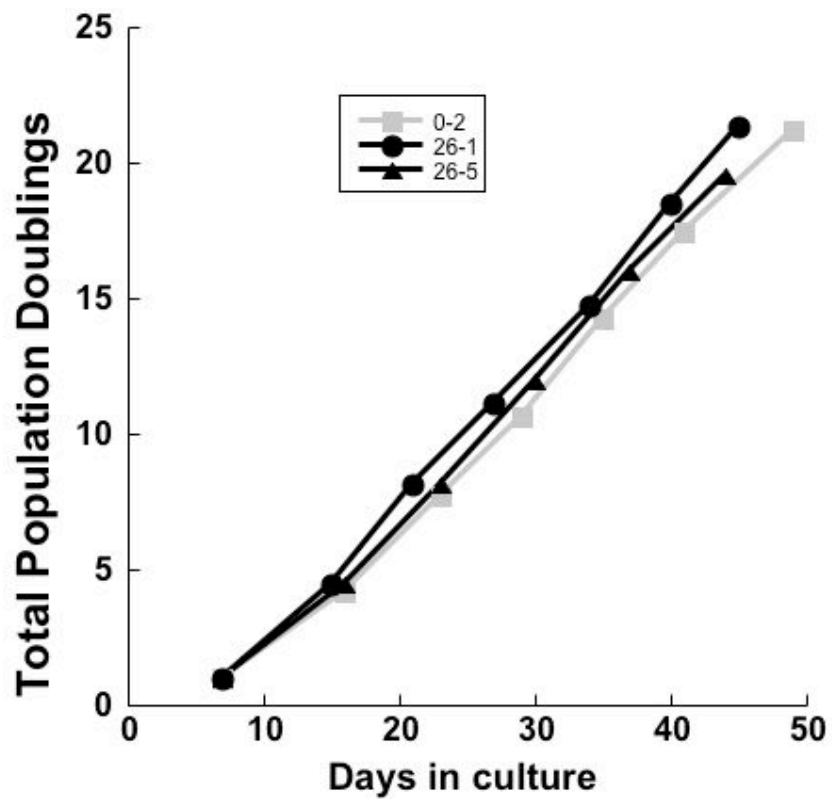

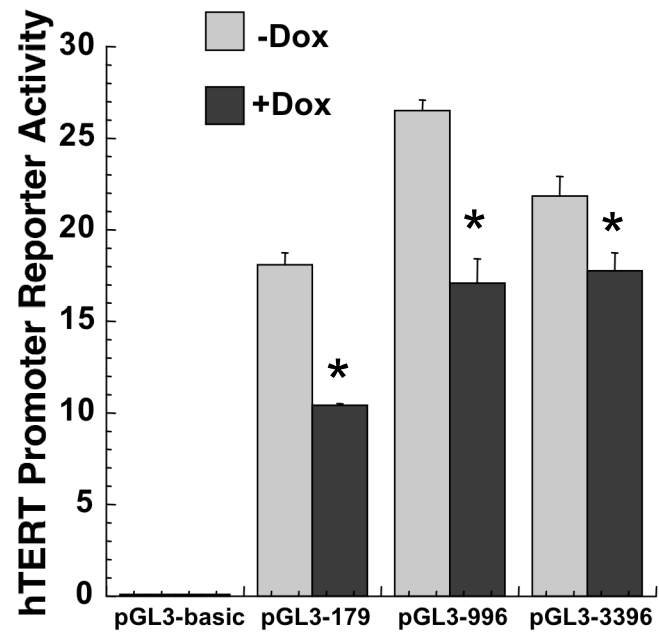

**A**

**Region A (promoter)**

CTACCCCTTCACCTTCCAACTCCGCCTCCTCCGGCGGAACCCCGCCCCTCCCGTCCCGACCCCTCCCGAATCCCACCCCAACCCCTCCG  
AACCTCCCAACCCCTCCCTTTCCTTTCGGGACCCCGCCCTCTCCTCGGGACGGGAATTTCAAACAACGGCTAGTCTCTACTACGGCA  
+1 **Region B (CTCF binding site)**  
CGTAAAAAACCTAACCCTGACCACCCCGCGATACCGCGCGCTCCCGCTACCGAACCGTACGCTCCCTACTACGCAACCACTACC  
GCGAAATACTACGGCTAACACGTTGGTACGACGCCCTAAAACCCCAAATAAC

**B**

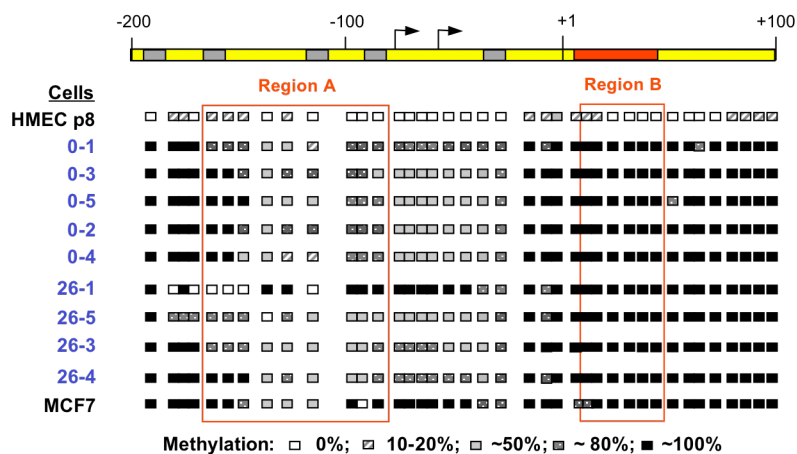

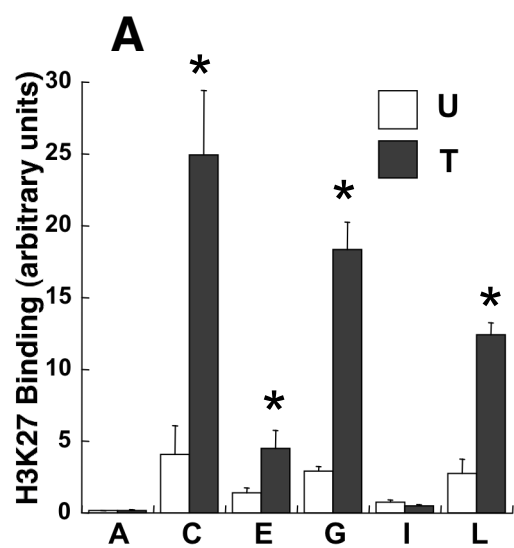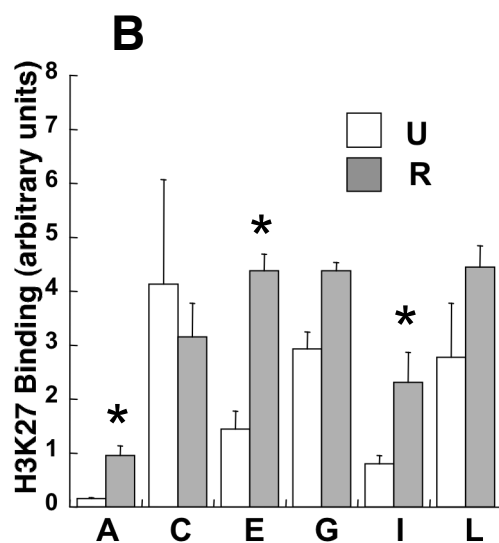

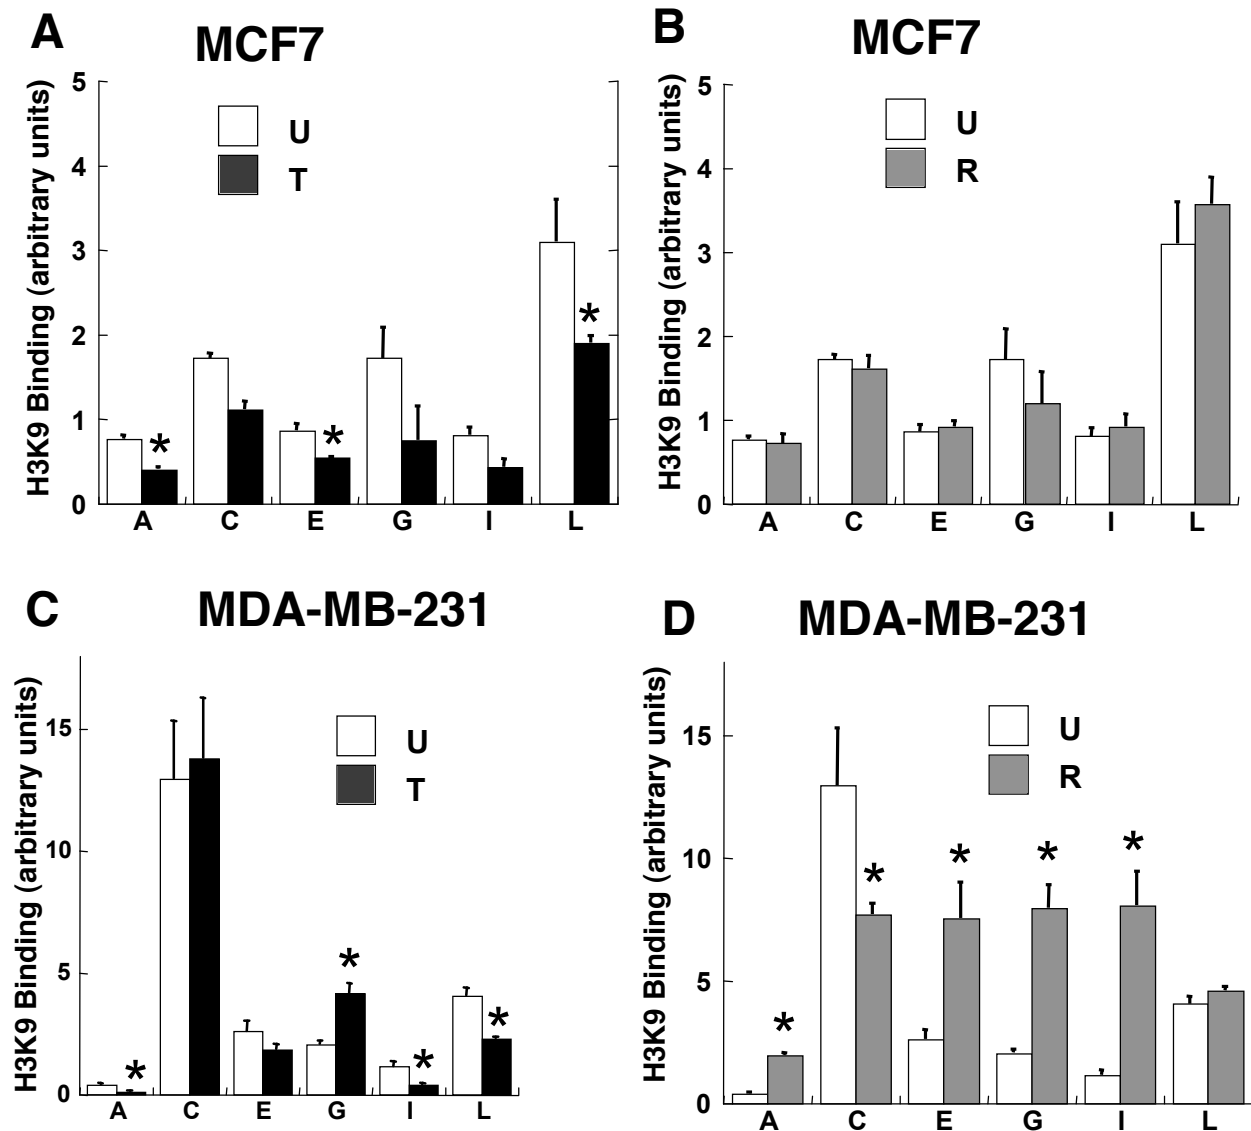

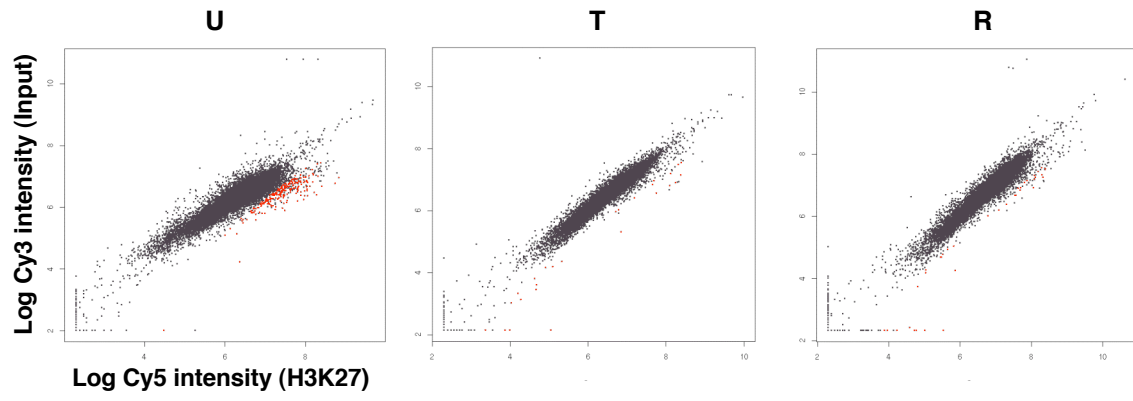

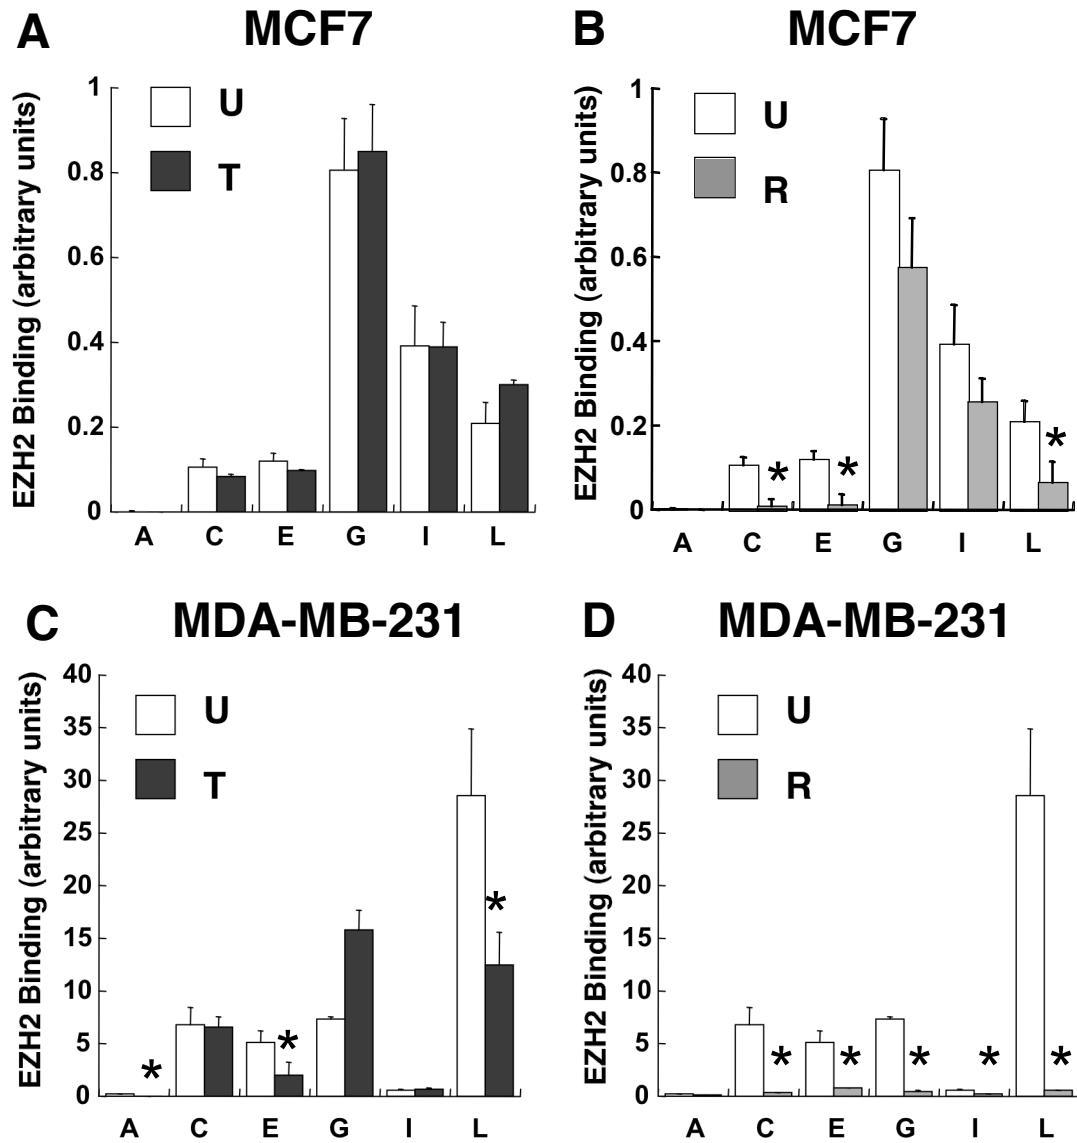

Supplement: NIHMS215452-supplement-Supp_Fig_S1-S8.pdf [file NIHMS215452-supplement-Supp_Fig_S1-S8.pdf]
